# Supplementary material for: Enhancing Aotearoa, New Zealand’s Free Healthline Service through Image Upload Technology
Source: Hindawi journal article supplement (doi:10.1155/2024/6644580), 2024-02-02
Supplement: f1 [file 6644580.f1.zip]

## Supplementary Material

**Table T1.** Image Upload Contacts by Month 2021-2022.

| Month  | Image Upload Contacts | Daily Average |
|--------|-----------------------|---------------|
| Mar-21 | 1,146                 | 39.5          |
| Apr-21 | 1,369                 | 45.6          |
| May-21 | 1,503                 | 48.5          |
| Jun-21 | 1,420                 | 47.3          |
| Jul-21 | 1,405                 | 45.3          |
| Aug-21 | 1,603                 | 51.7          |
| Sep-21 | 1,797                 | 59.9          |
| Oct-21 | 1,992                 | 64.3          |
| Nov-21 | 1,924                 | 64.1          |
| Dec-21 | 2,260                 | 72.9          |
| Jan-22 | 2,333                 | 75.3          |
| Feb-22 | 1,476                 | 52.7          |
| Mar-22 | 1,269                 | 40.9          |
| Apr-22 | 1,591                 | 53.0          |
| May-22 | 1,665                 | 53.7          |
| Jun-22 | 1,719                 | 57.3          |
| Jul-22 | 2,039                 | 65.8          |
| Aug-22 | 2,294                 | 74            |

|              |               |             |
|--------------|---------------|-------------|
| Sep-22       | 1,924         | 64.1        |
| Oct-22       | 2,275         | 73.4        |
| Nov-22       | 2,321         | 77.4        |
| Dec-22       | 2,720         | 87.7        |
| <b>Total</b> | <b>40,045</b> | <b>59.9</b> |

**Table T2.** Image Upload Contacts by Ethnic Group (2021-2022) compared to the NZ demographic (2018).<sup>18</sup> The acronym ‘MELAA’ stands for “Middle Eastern, Latin American and African”.

| <b>Ethnic Group</b> | <b>Image Upload Contacts</b> | <b>%</b>    | <b>NZ demographic (2018)<sup>18</sup></b> |
|---------------------|------------------------------|-------------|-------------------------------------------|
| NZ European         | 23,878                       | 59.6%       | 70.2%                                     |
| Māori               | 8,319                        | 20.8%       | 16.5%                                     |
| Pasifika            | 2,284                        | 5.7%        | 8.1%                                      |
| Asian               | 1,990                        | 5.0%        | 15.1%                                     |
| MELAA               | 300                          | 0.7%        | 1.5%                                      |
| Other               | 1,957                        | 4.9%        | 1.2%                                      |
| Unknown             | 1318                         | 3.3%        | -                                         |
| <b>Total</b>        | <b>40,045</b>                | <b>100%</b> | <b>100%</b>                               |

**Table T3.** Image Upload Contacts by Age Group and Year (2021-2022), with proportions.

| Age Group   | 2021 images uploaded | 2022 images uploaded | Total % | Total Healthline Calls (2022) |
|-------------|----------------------|----------------------|---------|-------------------------------|
| Under 1     | 1,290                | 2,309                | 9.0%    | 18,115 (4.8%)                 |
| 1-2 years   | 1,383                | 2,233                | 9.0%    | 15,543 (4.1%)                 |
| 2-5 years   | 2,662                | 3,776                | 16.1%   | 33,029 (8.7%)                 |
| 6-12 years  | 1,858                | 2,592                | 11.1%   | 23,883 (6.3%)                 |
| 13-19 years | 1,262                | 1,735                | 7.5%    | 26,411 (7.0%)                 |
| 20-24 years | 1,435                | 1,906                | 8.4%    | 38,492 (10.1%)                |
| 25-29 years | 1,408                | 1,783                | 8.0%    | 37,327 (9.8%)                 |
| 30-34 years | 1,183                | 1,539                | 6.8%    | 33,524 (8.8%)                 |
| 35-39 years | 895                  | 1,144                | 5.1%    | 24,694 (6.5%)                 |
| 40-44 years | 578                  | 968                  | 3.9%    | 19,973 (5.3%)                 |
| 45-49 years | 536                  | 706                  | 3.1%    | 16,742 (4.4%)                 |
| 50-54 years | 456                  | 641                  | 2.7%    | 16,188 (4.3%)                 |
| 55-59 years | 398                  | 574                  | 2.4%    | 13,928 (3.7%)                 |
| 60-64 years | 282                  | 462                  | 1.9%    | 13,058 (3.4%)                 |

|              |        |        |        |               |
|--------------|--------|--------|--------|---------------|
| 65-74 years  | 401    | 615    | 2.5%   | 20,775 (5.5%) |
| 75-84 years  | 231    | 392    | 1.6%   | 12,914 (3.4%) |
| 85+ years    | 152    | 226    | 0.9%   | 4,449 (1.2%)  |
| <b>Total</b> | 16,410 | 23,601 | 100.0% | 379,571       |

**Table T4.** Image Upload Contacts by New Zealand Urban and Rural Areas in 2022.

| <b>NZ Area Type</b> | <b>Images<br/>Uploaded</b> | <b>%</b> | <b>Total Healthline<br/>Calls</b> | <b>%</b> |
|---------------------|----------------------------|----------|-----------------------------------|----------|
| Urban-1             | 10,593                     | 60.9%    | 234,233                           | 61.1%    |
| Urban-2             | 3,107                      | 17.9%    | 62,867                            | 16.4%    |
| Rural-1             | 1,710                      | 9.8%     | 33,240                            | 8.7%     |
| Rural-2             | 642                        | 3.7%     | 10,742                            | 2.8%     |
| Rural-3             | 216                        | 1.2%     | 3,515                             | 0.9%     |
| Unknown             | 1,131                      | 6.5%     | 38,881                            | 10.1%    |
| <b>Total</b>        | 17,399                     | 100.0%   | 383,478                           | 100.0%   |

## HEALTHLINE IMAGES UPLOADED BY NZ AREA 2022

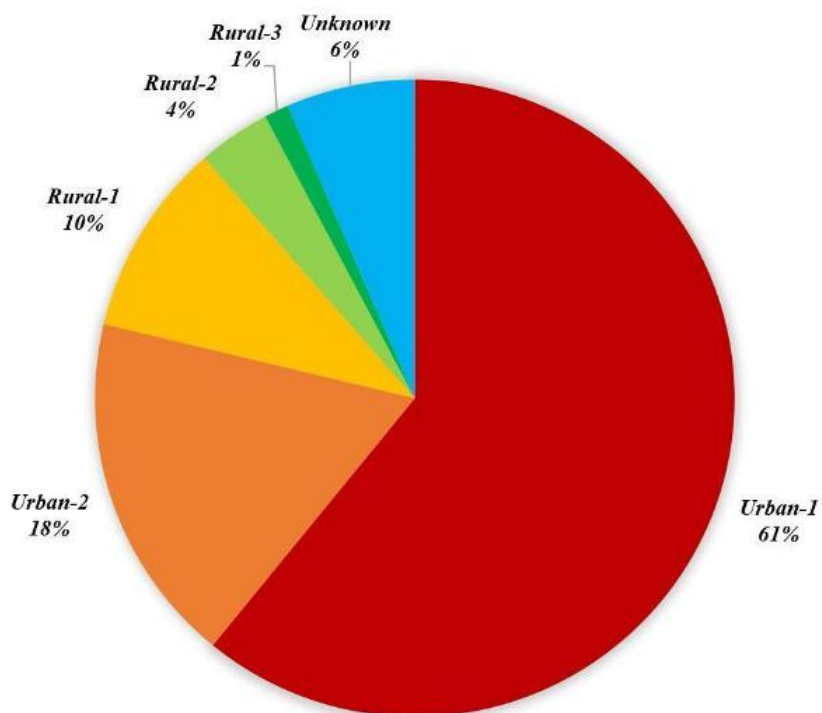

**Figure S1.** Healthline image upload contacts by New Zealand area and whether it is urban or rural (2022). With Urban-1 being the most urban and Rural-3 being the most rural/remote areas.

**Table T5.** New Zealand Urban and Rural Area image upload proportions comparison with the NZ demographic (2018).<sup>18</sup>

| NZ Area Type | Healthline Images Uploaded % | NZ Demographic % <sup>18</sup> |
|--------------|------------------------------|--------------------------------|
| Total Urban  | 78.7                         | 83.7                           |
| Total Rural  | 14.8                         | 16.3                           |
| Unknown      | 6.5                          | -                              |

**Table T6.** Comparison of Healthline Outcomes for total Healthline calls and the number of image upload contacts (2021-2022).

| Healthline Outcome   | Total Healthline Calls | %             | No. of Image Upload Contacts | %             |
|----------------------|------------------------|---------------|------------------------------|---------------|
| 111 Emergency        | 24,192                 | 3.6%          | 390                          | 1.2%          |
| Emergency Department | 66,479                 | 9.9%          | 2,124                        | 6.5%          |
| Urgent Care          | 113,646                | 16.9%         | 7,883                        | 24.0%         |
| On Call Dr/GP/Other  | 14,486                 | 2.2%          | 1,662                        | 5.1%          |
| GP                   | 163,004                | 24.3%         | 12,080                       | 36.7%         |
| Pharmacist           | 4,915                  | 0.7%          | 498                          | 1.5%          |
| Self Care            | 224,212                | 33.4%         | 7,550                        | 22.9%         |
| Other                | 60,630                 | 9.0%          | 713                          | 2.2%          |
| <b>Total</b>         | <b>671,564</b>         | <b>100.0%</b> | <b>32,900</b>                | <b>100.0%</b> |

**Table T7.** The number of clinicians using the image upload service by month with the average number of uploads by each clinician (Mar 2021 - Jun 2023).

| Month  | Number of Clinicians using the service | Average no. of uploads by each Clinician |
|--------|----------------------------------------|------------------------------------------|
| Mar-21 | 104                                    | 8.4                                      |
| Apr-21 | 129                                    | 8.3                                      |
| May-21 | 125                                    | 9.3                                      |
| Jun-21 | 121                                    | 9.5                                      |
| Jul-21 | 121                                    | 9.2                                      |
| Aug-21 | 120                                    | 10.5                                     |

|                |              |            |
|----------------|--------------|------------|
| Sep-21         | 140          | 9.7        |
| Oct-21         | 148          | 9.7        |
| Nov-21         | 143          | 10.3       |
| Dec-21         | 151          | 11.3       |
| Jan-22         | 145          | 12.0       |
| Feb-22         | 135          | 7.0        |
| Mar-22         | 136          | 5.1        |
| Apr-22         | 142          | 8.3        |
| May-22         | 178          | 7.2        |
| Jun-22         | 287          | 4.6        |
| Jul-22         | 270          | 5.8        |
| Aug-22         | 260          | 6.9        |
| Sep-22         | 269          | 5.5        |
| Oct-22         | 247          | 6.9        |
| Nov-22         | 233          | 7.5        |
| Dec-22         | 239          | 8.2        |
| <b>Average</b> | <b>181.2</b> | <b>8.5</b> |

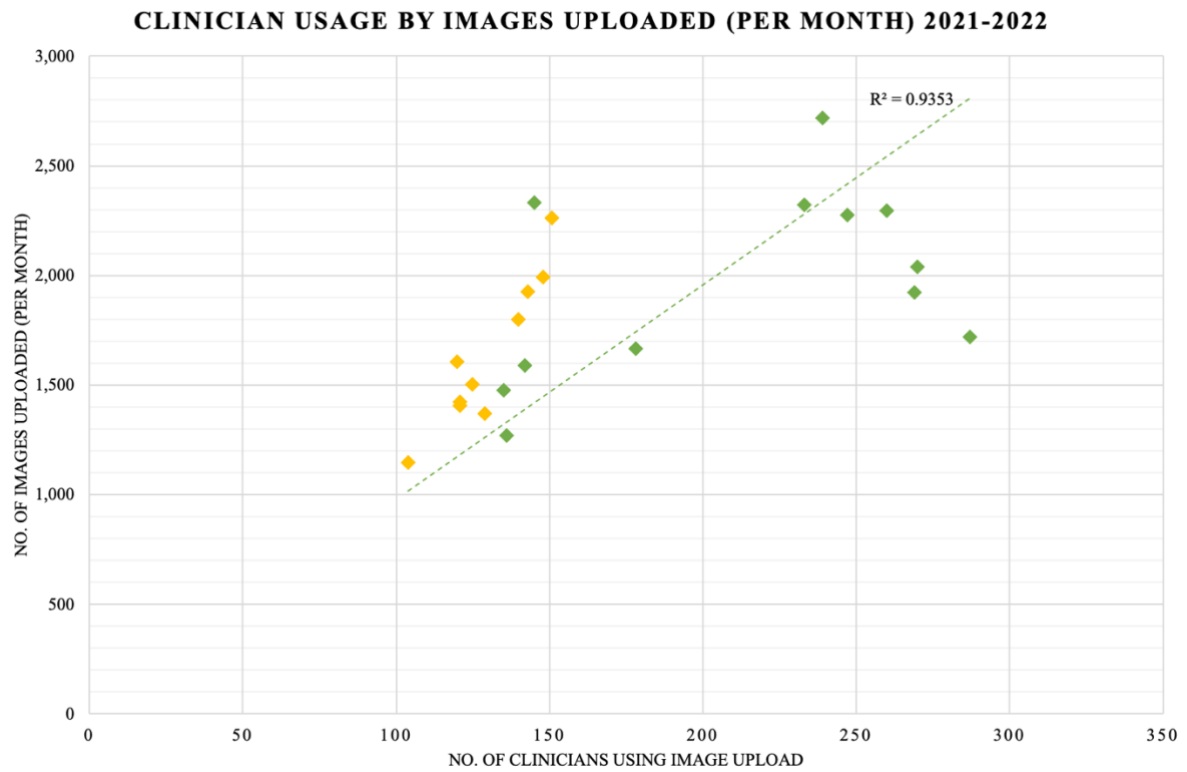

**Figure S2.** The number of clinicians using image upload each month is plotted with the number of images uploaded per month (2021-2022). A linear trendline is shown with its respective  $R^2$  value. Yellow data points represent 2021 data, and green for 2022.
