# Supplementary material for: Enhancing Aotearoa, New Zealand's Free Healthline Service through Image Upload Technology
Source: Int J Telemed Appl. 2024 Feb 2;2024:6644580. doi: 10.1155/2024/6644580 (PMC10857879; doi:10.1155/2024/6644580)
Supplement: Supplementary Materials — A supplementary material file is attached. This file includes all of the data used in this research manuscript to create each figure and table (Table T1-T7). This file also includes further results not included in this manuscript (Figure S1 and S2). [file 6644580.f1.zip]

Archive with 2 entries (2 files):
- Supplementary Material v3.docx
- Supplementary Material v3.pdf
